# Supplementary material
Source: publisher site journal article supplement (https://www.dovepress.com/article/285361)

Table S1 Dosage and schedule of the treatment regimen

| Regimen | Drug dosage | Schedule | Duration |
| --- | --- | --- | --- |
| SOX | Oxaliplatin: 130mg/m2 IV | Days 1 | Q3wk, up to 8 cycles |
|  | S-1: 80mg (<1.25m2); 100mg (1.25-1.5m2); 120mg (>1.5m2) PO | Days 1-14 |
| CapeOX | Oxaliplatin: 130mg/m2 IV | Days 1 | Q3wk, up to 8 cycles |
|  | Capecitabine: 1000 mg/m2 PO | Days 1-14 |
| FOLFOX | Oxaliplatin: 85 mg/m2 IV | Days 1 | Q2wk, up to 12 cycles |
|  | Leucovorin: 400 mg/m2 IV | Days 1 |
|  | 5-Fu: 400 mg/m2 IVP | Days 1 |
|  | 5-Fu (continuous): 2400-3000 mg/m2 IV | Days 1-2 |
| CS | Cisplatin: 60 mg/m2 IV | Days 1 | Q3wk, up to 8 cycles |
|  | S-1: 80mg (<1.25m2); 100mg (1.25-1.5m2); 120mg (>1.5m2) PO | Days 1-14 |
| PS | Paclitaxel: 80 mg/m2 IV | Days 1, 8 | Q3wk, up to 8 cycles |
|  | S-1: 80mg (<1.25m2); 100mg (1.25-1.5m2); 120mg (>1.5m2) PO | Days 1-14 |
| PX | Paclitaxel: 80 mg/m2 IV | Days 1, 8 | Q3wk, up to 8 cycles |
|  | Capecitabine: 1000 mg/m2 PO | Days 1-14 |
| XELIRI | Irinotecan: 180 mg/m2 IV | Days 1 | Q3wk, up to 8 cycles |
|  | Capecitabine: 1000 mg/m2 PO | Days 1-14 |

Abbreviations: PO, by oral; IV, intra venous

Fig S1 Kaplan-Meier estimates of overall survival (A) and progression free survival (B) stratified by completion of 6-cycle chemotherapy treatment


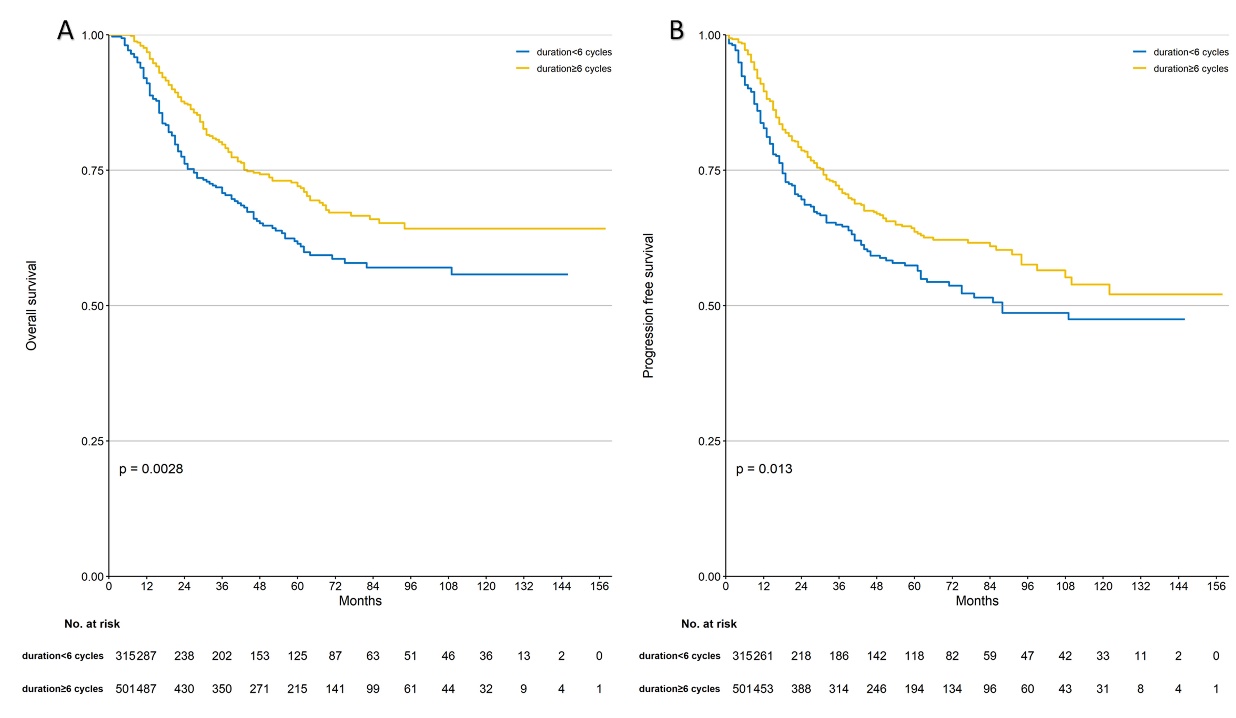


Fig S2 Kaplan-Meier estimates of overall survival (A) and progression free survival (B) according to the time interval from the completion of surgery to starting the adjuvant chemotherapy


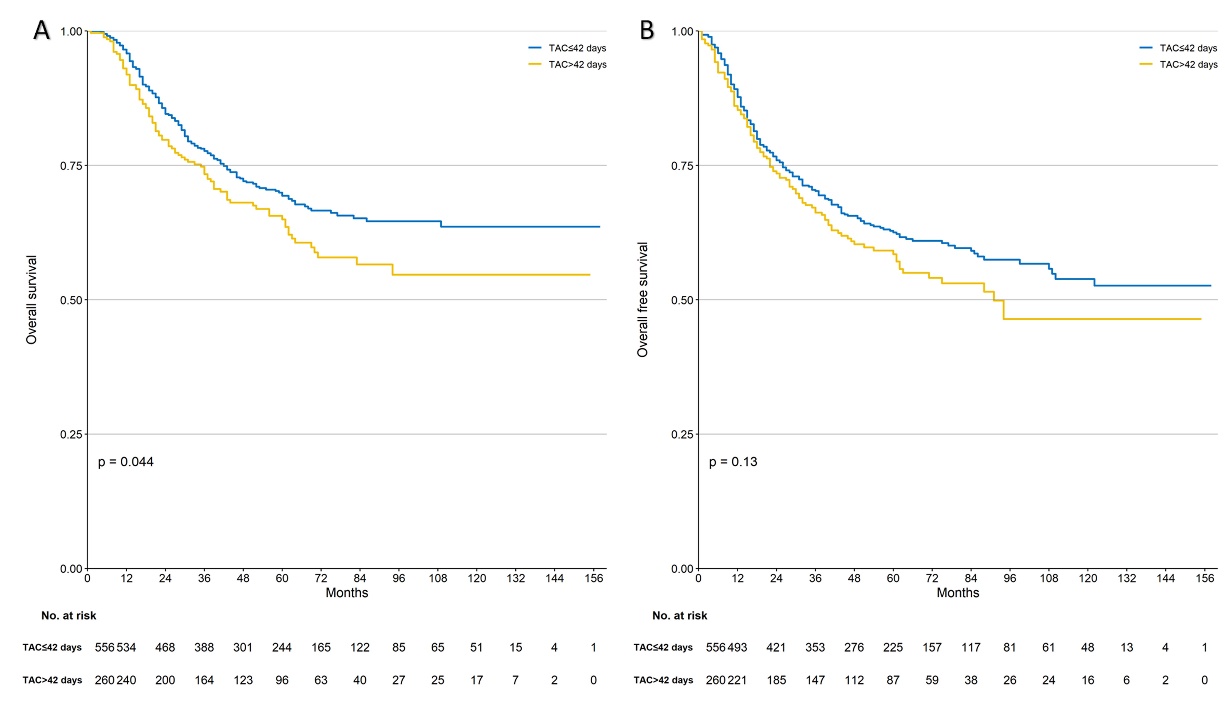

Supplement: Supplementary file 1 [file get_supplementary_file.php]
